# Supplementary material
Source: publisher figshare collection journal article supplement (https://acs.figshare.com/ndownloader/files/3960937)
Supplement: Supplementary file 1 [file 3960937]

# **Preparation of polystyrene microspheres using rosin-acrylic acid diester as a crosslinking agent**

Cai-li Yu<sup>1</sup>, Xiaolei Wang<sup>1</sup>, Chuanwei Chen<sup>1</sup>, Faai Zhang<sup>2\*</sup>

<sup>1</sup>*Ministry-province jointly-constructed cultivation base for state key laboratory of Processing for non-ferrous metal and featured materials, Guangxi Zhuang Autonomous Region; Key Laboratory of New Processing Technology for Nonferrous Metals and Materials, Ministry of Education; College of Chemistry and Biology Engineering, Guilin University of Technology, Guilin 541004, China;* <sup>2</sup>*College of Material Science and Engineering, Guilin University of Technology, Guilin 541004, China. Email: zhangfaai@163.com*

Correspondence to: Dr and Prof. Fa-Ai Zhang, College of Material Science and Engineering, Guilin University of Technology, No 12 Jiangnan Road, Guilin 541004 , P. R. China. Fax: 86-773-5896672, E-mail: zhangfaai@163.com

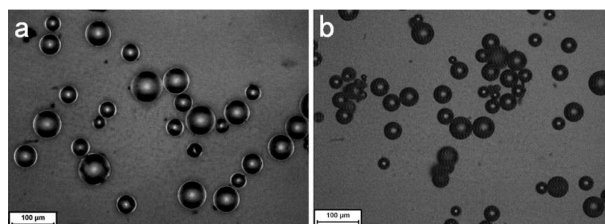

Fig. S1 Optical microscope images of polymer microspheres with different temperature

(a: 85 °C ; b: 90 °C)

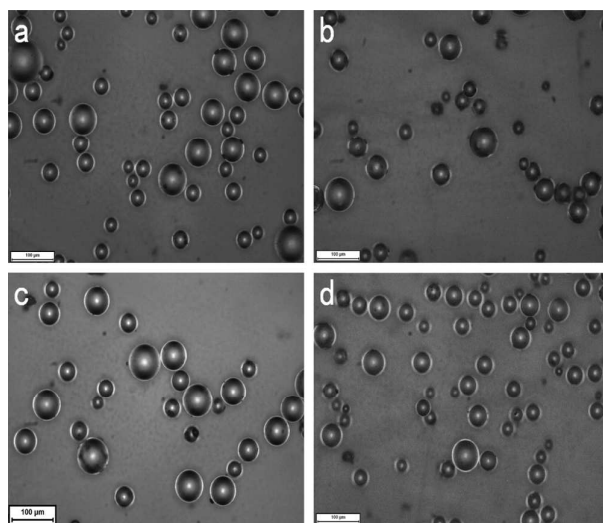

Fig. S2 Optical microscope images of polymer microspheres prepared at different stirring speed (rpm, a: 300; b: 400; c: 500; d: 600). Scale bar: 100  $\mu\text{m}$ .
